# Supplementary material for: Development, usability, and feasibility pilot cluster randomized controlled study of a videogame aiming to stimulate cognitive and non-cognitive skills among low-income preschoolers in Santiago, Chile
Source: Research Square preprint supplement (doi:10.21203/rs.3.rs-7032367/v1), 2025-08-11
Supplement: Supplementary file 1 [file 4eadc9dee84f89961cc29c12.docx]

# **Suppl. 1: Description of each session of the Japi 1.0 video game**

**Session 1:**

A dog character will appear on the screen and will introduce the session by telling the children about the topic they will cover in the session. This character will appear throughout the game.

**Activity number 1 - Emotional Recognition:** A cloud will appear representing the mind of the child's character. From there, the student must observe these images and select the one corresponding to the emotion requested by the dog.

**Activity number 2- Inhibitory Control:** Individually and continuously, fruits with faces showing different emotions will appear. The student must select, within this set of fruits, the fruits that are happy.

**Activity number 3- Emotional Recognition:** The cloud mentioned in activity number 1 will appear again. The child must repeat the action.

**Activity number 4 - Inhibitory Control:** In this activity, balloons will appear on the screen flying upwards (one at a time), the student must pop the balloons, touching them, according to the emotion that is asked.

**Activity number 5- Emotional Recognition:** Students must complete the face with the features (eyes and mouth) that represent the required emotion, matching both parts of the face.

**Activity number 6 - Inhibitory Control:** Students should select the masks that represent the requested emotion.

**Activity number 7 - Emotional Recognition:** The students should paint on different faces, moving their finger over it, which will lead them to discover the emotion that the face transmits.

**Activity number 8 - Inhibitory Control:** Several toothbrushes with faces showing different emotions will appear on the screen, individually and continuously. Students must touch the toothbrushes that have the requested emotion.

**Session 2:**

As in session 1, a dog character will appear on the screen and introduce the session by telling the children about the topic they will cover in the session.

**Activity number 1- Emotional Recognition:** The dog character will tell the children about a situation. Then, a set of balloons of different colors will appear on the screen. The students must pop the balloons (touch them) according to the color that the dog indicates in order to discover the reason for the situations told by the dog.

**Activity number 2 - Inhibitory Control:** A set of small elements will appear on the screen, and in the center, a large element that will constantly change. The children must touch the element in the center (candy, kite, ice cream, drink, and band-aid patch) only when it turns the color the dog mentions, without touching the smaller elements around it.

**Activity number 3 - Emotional Recognition:** The dog character will tell the children about a situation. Then, a set of kites of different colors will appear on the screen. The students must touch the kites according to the color that the dog indicates to them in order to discover the reason for the situations mentioned.

**Activity number 4 - Inhibitory Control:** As in activity 2, again the child must touch the element in the center (boat, ball, slipper, cap, airplane) only when it turns the color that the dog mentions, without touching the smaller elements around it.

**Activity number 5 - Emotional Recognition:** The child must observe the image that the dog character presents. Then he/she must touch five elements (sections of the image) that have caused the emotion of the character in the image.

**Activity number 6 - Inhibitory Control:** In this exercise, the student must touch the elements (ball, candy, shoe, drink) in the center according to the color that the dog indicates, based on the emotion that the image of the "friend's" face represents. As in the previous exercises (2, 4), he should also not touch the small elements that are around him.

**Activity number 7 - Emotional Recognition:** In this exercise, the student must carry out two actions:

1. To observe the image that the dog presents to him, and then based on this, to select the face (by touching it) that represents the emotion of the character that the dog asks for.
2. After that, the student must touch the image that represents the correct way to solve the problem previously presented in the image.

**Activity number 8 - Inhibitory Control:** This exercise has two parts:

1. The student must make all the faces presented to him in the beginning happy. To do this, he/she must touch them until they are happy.
2. The child, again, must touch the element in the center (kite, ball, elephant, slipper, pencil) according to the colors that the dog asks for, without touching the small elements that are around.

**Session 3:**

As in the previous sessions, the character of a dog will appear on the screen and will introduce the session by telling the children the theme that they will cover in the session.

**Activity number 1- Emotional Recognition:** The child must observe a set of images showing situations. From them, he/she must classify the images according to whether they are comfortable or uncomfortable situations; to do so, he/she must drag the comfortable situations (keeping the finger pressure on the screen) to the green column and the uncomfortable ones to the pink column.

**Activity number 2- Inhibitory Control:** In this exercise, the characters visit the zoo. In this activity, the student must perform two actions:

1. Select from a set of images, the comfortable way to carry out certain actions related to animals.
2. Listen and memorize the relationship between the color of the small insect and the color of the big insect, so that from the insect that appears in the middle (big), select the button (smaller insect) corresponding to the association.

**Activity number 3- Emotional Recognition:** In this new activity, the student must use two emotions: Tired and Excited. The child must identify from a set of images the one in which the children show one of these emotions, according to what the dog character is asking.

**Activity number 4- Inhibitory Control:** This exercise is divided into two parts:

1. The student must touch, from a set of faces, the one that is excited.
2. Listening and memorizing the relationship between the small insect and the large insect that is associated with it, so that from the insect that appears in the middle (large), the student can select the button (small insect) that corresponds to the association.

**Activity number 5- Emotional Recognition:** The child will have to play to "draw" the face depending on the emotion that the dog character asks for. To do this, the child must complete the face, placing the pair of eyes that best relates to the expression shown by the mouth.

**Activity number 6- Inhibitory Control:** This activity is divided into two parts:

1. The students must identify the emotions from a set of faces, where they must select the one that represents the emotion that the dog is asking them.
2. Listen and memorize the relationship between the small animal and the big animal that is associated with it in order to select the button (container) corresponding to the association from the animal that appears in the middle (big).

**Activity number 7 - Emotional Recognition:** In this exercise, the child must select, within a set of faces, the one that corresponds to the emotion of the character that receives the action in the situation that is presented through an image.

**Activity number 8- Inhibitory Control:** In this activity, children must perform two actions:

1. From a set of three images, they must select the one that would make their friends very excited. They must do this by observing the three images presented and selecting the one in which the characters are enthusiastic.
2. They should listen and memorize the key-animal color relationship and then, based on the central image of an animal, press the key button with the color that corresponds to each of them.

**Session 4:**

As in the previous sessions, the character of a dog will appear on the screen and will introduce the session by telling the children the theme that they will cover in the session.

**Activity number 1- Emotional Recognition:** In this exercise, the child will have to select from a set of images those in which the characters represent the requested emotion (frustrated or proud).

**Activity number 2 - Inhibitory Control:** Small faces will appear on the screen and a large face in the center, which will constantly change its emotion. The children should touch the big face in the center only when it has the emotion requested by the dog (e.g., angry, scared), without touching the smaller ones.

**Activity number 3- Emotional Recognition:** In this exercise, the student must complete the face according to the mouth shown. To do this, the student must select the eyes that best express the emotion represented by the mouth, dragging them to their place.

**Activity number 4- Inhibitory Control:** As in activity 2, small faces will appear on the screen and a big face in the center, which will constantly change its emotion. The children must touch the big face in the center only when it has the emotion requested by the dog (pride), without touching the smaller ones.

**Activity number 5- Emotional Recognition:** In this activity, the children must discover the emotion that the child would have from the image presented to them. To do this, they must select from a set of faces with different emotions the one that corresponds.

**Activity number 6- Inhibitory Control:** As in activities 2 and 4, small faces will appear on the screen and a large face in the center, which will constantly change its emotion. The children must touch the big face in the center only when it has the emotion requested by the teacher's character, without touching the smaller ones.

**Activity number 7- Emotional Recognition:** The children must play to score points with a ball. To do this, various ball arcs (e.g., rugby, basketball, etc.) will appear on the screen, and the children will have to keep their finger touching the ball until the red light comes on. When that happens, they must stop touching the ball, and it will automatically shoot towards the goal.

**Activity number 8- Inhibitory Control:** As in activities 2, 4, and 6, small faces and a big face in the center will appear on the screen, which will constantly change their emotions. The children should touch the big face in the center only when it has the emotion requested (happy) by the teacher's character, without touching the smaller ones.

**Session 5:**

As in the previous sessions, a dog character will appear on the screen and will introduce the session by telling the children the topic they will cover in the session.

**Activity number 1- Emotional Recognition:** The students will have to do two actions in this exercise:

1. Listen and observe one of the strategies (narrated by the dog character) that they can use to calm frustration:

- Breathe through the nose, mentally counting to 3.

- Hold your breath for a mental count of 3.

- Breathe out for a mental count of 3.

1. Next, the student should put into practice the strategy seen above. To do so, he/she will have to do the following:

- He should hold down the button on the child's nose for three seconds, that is, until the red light on the traffic light on the right side comes on. Then stop touching the button.

- The button on the child's chest should be held down for three seconds, that is, until the red light on the traffic light on the right side comes on. Then stop touching the button.

- The button on the child's mouth should be held down for three seconds, that is, until the red light on the traffic light on the right side comes on. Then you should stop touching the button.

- You must perform the complete cycle, you must hold down the button that is on the nose, then the chest, and finally in the mouth. Each of these cycles, you must keep the button pressed for three seconds, that is, until the red light on the traffic light on the right side comes on. Then you should stop playing.

**Activity number 2- Inhibitory Control:** Listen and observe the instructions given by the dog character. The student must perform two actions

A) Observe the big face that is enclosed in a circle, and identify the emotion.

B) He must associate a certain emotion with the face that will appear in a circle, and he must press the button where a face with a different emotion is found, to the face enclosed in the circle.

Example: When a calm face appears (enclosed in a circle), you must press the button of the angry face, and when an angry face appears (enclosed in a circle), you must press the button of a calm face.

**Activity 3- Emotional Recognition:** Listen to the instructions given by the teacher, who will indicate that they should order the events, according to the methods they have learned to calm down. The student must perform two actions:

1. Observe the image that will appear at the top of the tablet.
2. Observe and order in a logical sequence, the five images that will appear at the bottom of the tablet; for this, the children must use the method learned to calm down (cross their arms, breathe through the nose, and exhale through the mouth).

**Activity 4- Inhibitory Control:** Listening to the instructions that the teacher will indicate, the student must perform two actions

A) Observe the insects that will appear enclosed in a circle.

B) To associate that the insect that is enclosed in a circle has a certain emotion and must press the button with the opposite insect, which will also have a different emotion.

**Activity 5 - Emotional Recognition:** Listening and observing the instructions given by the dog character, the student should apply the strategies that have been practiced previously to calm down. The student must be attentive to touch the part of the body indicated by the dog and wait three seconds, that is, for the red light to turn off and the green light to turn on.

**Activity 6- Inhibitory Control:** Listen to the instructions given by the teacher for the game. The student must perform two actions.

1. Observe and identify the emotion of the animal that will appear in the center of the screen, which will be bigger than the other animals.
2. Associate that the central animal will have a certain emotion, and press the button that has an animal and emotion different from the central animal.

**Activity 7- Emotional Recognition:** Listening to the instructions given by the dog character, four images of certain situations will appear. At the bottom of the screen, two images will appear; the student must choose the missing image to complete the logical sequence.

**Activity 8- Inhibitory Control:** Listening to the instruction given by a character in the game, the student must perform two actions.

A) He/she must identify a face and associate it with a certain emotion.

B) He must press the button that has a different mask from the central one, and not press the small masks that will change from time to time.

**Session 6:**

As in the previous sessions, the character of a dog will appear on the screen and will introduce the session by telling the children the topic they will cover in the session.

**Activity number 1- Social Competence:** In this exercise, students must carry out two actions:

1. Select, from a set of situations represented in images, those that represent a problem.
2. Recognize the emotion felt by one of the characters present in that problem. The character will be specified by the dog, and the children must select (touch), within a set of faces, the one that represents the emotion.

**Activity number 2 - Working Memory:** In this exercise, the children must listen to the sounds of the animals, memorizing the order in which they heard them. Then, they must drag the image of the animal into the boxes in the same order in which they heard them.

**Activity number 3 - Social Competence:** Students must perform two actions:

1. Listen to a situation told by the dog character, where they themselves are mentioned as characters present in the situation. Then, they must select among a set of images, which would be the problem that represents that situation.
2. They should recognize the emotions they might feel when they are the protagonists of those situations mentioned. For that, the children must select, from a set of faces, the one that represents the emotion they would feel in that situation.

**Activity number 4 - Working Memory:** In this game, the characters arrive at the beach. What the student must do is to observe and memorize the order in which the beach objects light up (blink), and then drag them and place them in the boxes in the order in which they lit up.

**Activity number 5 - Social Competence:** In this next activity, students will look at a picture of a situation. From this image, they must think about what could happen next, to select the answer by touching the corresponding image.

**Activity number 6 - Working Memory:** In this activity, the children will have to play at putting together their backpack to go to school. To do this, they must listen to the objects that are named, memorize the order in which they were named, and then drag the images of the objects to the boxes in the memorized order.

**Activity number 7 - Social Competence:** In this next exercise, children must observe a set of images. These images represent different moments of the same story that represents a problem.) The students must order the images by dragging them into the boxes according to the correct sequence of the story.

**Activity number 8 - Working Memory:** The children should observe and memorize the order in which the squares of the "fight" game are illuminated. Then they should touch the squares following the same order presented at the beginning.

**Session 7:**

As in the previous sessions, a dog character will appear on the screen and will introduce the session by telling the children the topic they will cover in the session.

**Activity number 1 - Social Competence:** In this game, the children are presented with a set of 4 circles of different colors, which they must arrange differently in each of the trials (5 trials) by dragging the circles inside the boxes.

**Activity number 2 - Working Memory:** In this exercise, the students will play again to put the backpack in order, but this time, to go home. To do this, they will have to listen to the objects named by the teacher's character, memorizing the order in which they were named, and then drag the images of the objects to the boxes in the same order.

**Activity number 3 - Social Competence:** The children will be presented with a set of small figures of different colors (on the left side of the screen) and a large white figure (in the middle of the screen). The children must use the figures of colors to assemble the big figure, dragging them inside this figure and matching each part with the corresponding figure.

**Activity number 4 - Working Memory:** Several children will appear on the screen in a horizontal row. The student must first observe the exercises done by the children and memorize the order in which they were carried out, and then play each exercise, keeping the memorized order.

**Activity number 5 - Social Competence:** The children should, again, complete the large figure using smaller colored figures, just as in exercise 3 of this session.

**Activity number 6 - Working Memory:** The children will listen in a certain order to different ingredients to make a cake. They must memorize the order in which they were named, and then drag them (keeping the order) into the boxes.

**Activity number 7 - Social Competence:** In this exercise, the characters return to the beach. In this activity, students should look at a larger picture, which represents a situation in which there is a problem. The student must select from a set of images the one that answers the question "How are you?" based on an assertive solution to the problem.

**Activity number 8 - Working Memory:** The children are presented with a piano, where the piano keys light up in a certain order. The children must first observe and memorize that order and then play the keys while maintaining the order.

**Session 8:**

As in the previous sessions, a dog character will appear on the screen and will introduce the session by telling the children the topic they will cover in the session.

**Activity number 1- Social Competence:** In this exercise, the students do the following:

1. First, they observe different images. From these, the dog character will ask if they think it is a good or bad idea what is happening in the image. To answer that they think it is a good idea, they must touch the button with the ticket; otherwise, they must touch the "X".
2. They look for a solution to the problem presented in the first image (in the letter A), touching the image that represents this solution.

**Activity number 2 - Working Memory:** The students must play with putting different fruits inside a bag. To do this, they must listen and memorize the order in which the names of the fruits are mentioned and then drag them into the boxes in the same order memorized.

**Activity number 3 - Social Competence:** In this activity, the children play at putting together a puzzle. For this, first, the image of a situation is presented, and the dog character presents a hypothetically formulated question related to it (What would happen if...?). After listening to the question, the puzzle is presented, and the children must move the pieces, dragging them, in order to reach the answer to the question mentioned at the beginning, which will be represented in an image.

**Activity number 4 - Working Memory:** In this exercise, students must first observe and memorize the order in which the pieces of a puzzle shine, and then repeat this order, touching the pieces based on it.

**Activity number 5 - Social Competence:** In this activity, again, students will have to put the puzzle together to discover the answers to hypothetical questions, just as in exercise 3.

**Activity number 6 - Working Memory:** In this exercise, the students will have to play the game of putting the toys in the bag. To do this, they should listen and memorize the order in which these toys are mentioned, then drag them into the boxes in the same order they heard them.

**Activity number 7 - Social Competence:** In this new activity, students will have to look for solutions to various problems. To do so, they will have to look at the main image that will appear on the screen, in which the problem is presented, and then choose the most appropriate solution by touching, within the smaller images, the one that represents it.

**Activity number 8 - Working Memory:** In this exercise, a set of slippers will appear on the screen, shining in a certain order. The children will have to observe and memorize the order in which these elements shine (according to color), and then touch them, repeating that order.

**Session 9:**

As in the previous sessions, a dog character will appear on the screen and will introduce the session by telling the children the topic they will cover in the session.

**Activity number 1- Social Competence:** In this activity, the children play again to put together a puzzle. For that, first, the image of a situation that represents a problem is presented, based on which the dog character asks a question: "What is a good solution to solve this problem?". After listening to the question, a puzzle appears on the screen that the children must put together by dragging the pieces, in order to reach the answer to the question mentioned at the beginning.

**Activity number 2- Working Memory:** In this exercise, the students must listen and memorize the names of the characters of the masks that the teacher's character mentions. After that, the students must select the masks in the same order as the teacher named them.

**Activity number 3- Social Competence:** In this activity, children must play to discover what happens when we choose a solution to a problem. To do this, they must observe the main image that will appear on the screen and, based on this, choose from a set of smaller images the one that represents the solution to the problem.

*** In this case, it must be ensured that the child touches the three images, since all of them present a solution.**

**Activity number 4- Working Memory:** In this exercise, the children must observe and memorize the order in which the pieces of a butterfly puzzle are illuminated, and then touch them in the same order.

**Activity number 5- Social Competence:** Students should observe the large image and, based on it, order the smaller images (by dragging them with their finger), following the sequence of the story that would allow solving the problem presented in the large image.

**Activity number 6- Working Memory:** In this exercise, the children will play at "painting" the blank circles. To do this, they must first listen and memorize the order in which the teacher's character mentions the colors, and then touch them according to their colors, keeping the order.

**Activity number 7- Social Competence:** Three colored circles representing a traffic light will appear on the screen, and below them, a box (except for the yellow light, which contains two boxes). Each color represents the following:

Red: Stop, calm down

Yellow: Think of a solution to the problem.

Green: Take action to solve the problem.

Then, based on those colors, they should drag the small images (that together form a situation) to the different boxes, according to the color of the traffic light.

**Activity number 8 - Working Memory:** Students should observe and memorize the order in which the books blink, and then touch them in the same order.

**Session 10:**

As in the previous sessions, a dog character will appear on the screen and will introduce the session by telling the children about the topic they will be working on in the session.

**Activity number 1 - Social Competence:** In this exercise, the student must do two actions:

1. Listen to a small situation told by the dog character. After that, he/she must first, observe the big image that appears on the screen (which represents the situation already narrated) and identify the emotion that the dog character is asking for (How do you think he/she would feel ________?), touching the face that expresses it.
2. Select the X or the ticket, depending on whether or not that situation was a good solution in which everyone felt happy.

**Activity number 2- Working Memory:** In this activity, children must listen and memorize the order in which the different means of transportation are named, and then select them (by touching the image) in the same order in which they were named.

**Activity number 3- Social Competence:** In this game, children must perform two actions:

1. Listen to the situation narrated by the dog character. Then, an image will appear on the screen (the images are different for each trial), related to that situation, and based on it, they must answer the question: how do you think ____ (name of the character) would feel? They should answer this question by selecting the face that expresses the emotion they think is correct.
2. Then they should answer the questions: was it a good solution, did everyone feel happy, marking the X or the ticket as appropriate.

**Activity number 4- Working Memory:** In this activity, the children should observe and remember the order in which the colored circles light up, and then touch them in the same order.

**Activity number 5- Social Competence:** In this exercise, children should observe a main image and, based on it, answer two questions:

1. How do you think it will feel______ (Name of the character the dog mentions). To answer, they should select (by touching) the face that expresses the emotion felt by the character.
2. Was it a good solution? Did everyone feel happy? To answer, the children must choose yes or no by marking the ticket or the X as appropriate.

**Activity number 6- Working Memory:** In this game, the children will have to listen and memorize the order in which the colors of the bicycles will be named. Then, they will have to touch the bicycles in the same order in which their colors were mentioned at the beginning.

**Activity number 7- Social Competence:** The children, as in activity 5, will have to look at a main image that will appear on the screen (a different one per trial), and based on it, they will have to answer two questions:

1. How do you think ____ (name of the character) would feel? They should answer this question by selecting the face that expresses the emotion they think is correct.
2. Then they should answer the questions "Was it a good solution?" and "Was everyone happy?", marking the X or the ticket as appropriate.

**Activity number 8:** In this last exercise, the students will play "throw the bottles away". To do this, they must first observe and remember the order in which the bottles glow. Then they must touch them in the same order in which they glowed.
