# Supplementary material for: Development, usability, and feasibility pilot cluster randomized controlled study of a videogame aiming to stimulate cognitive and non-cognitive skills among low-income preschoolers in Santiago, Chile
Source: Research Square preprint supplement (doi:10.21203/rs.3.rs-7032367/v1), 2025-08-11
Supplement: Supplementary file 2 [file 581a29cb592f82d33e6bf44f.docx]

Suppl.2: Detailed description of errors detected before and during the implementation of the video game.

| Errors | Definition |
| --- | --- |
| Flow | |
| Abrupt change of activity | Abrupt passing from one activity to the following. This abrupt passing negatively affects the disposition to the next activity. |
| Game freezing | It was detected that for some activities, it was impossible to continue playing because the game froze and got stuck. |
| Audio | |
| Audio volume variations | Some audio recordings appear to have different volume intensities when moving from one activity to the following. This was clearer in the activities of auditory memory (students need to remember the order of a sequence of words) |
| Audio problems | Several audio problems were put together. For example:   - The music played when the player correctly completed the task was over the voice giving the instructions for the following activity or was heard out of the correct moment, so it was difficult for the player to do the next activity correctly. - Some audio recording with the instructions were missing, so it was difficult to play correctly the activity. - Some instructions were heard twice. |
| Screen and touchable elements | |
| Unexpected responsive surface | When children touched a surface outside the area of the activity, the game generated an error message and stopped. Children could not continue playing the game. |
| Dragging problems | Errors related to the action of dragging objects over the screen: when performing this action, the object was unable follow the finger of children. |
| Images or drawings out of place. | Some images or elements were cut in some borders and not visible to the player. |
| Overlapped elements | Some elements presented in the screen were overlapped, making it difficult for children to identify or touch them correctly. |
| Missing elements | Some elements were not available for children to complete a particular task of the activities (e.g., one activity asking children to identify an emotion looking at the face expression, there were not eyebrows or mouth to find out the expression) |
| Small surface of the touchable objects on the screen | The game produced an incorrect answer when children used two fingers to touch the screen or if children touched just outside the designated surface on the screen. The error was related to the small surface programed to be available for touching. |
| Instructions, correct, and incorrect answers | |
| Coherence between instructions and expected performance | - In some activities, the correct answer was not coherent with the instructions given. - In other activities, some instructions were unclear to the player, so it was difficult to complete the task. |
| Correct answers registered as incorrect | The instruction was fine, but when children performed the correct expected behavior in the game, this response from the game considered it incorrect. |
| Activities without correct answers | The instruction was fine, but there were no correct answers in the activities. This error produced frustration among children. |
| Absent remainder | The instruction and the correct and incorrect answers were fine, but in some activities where children needed to generate several correct sequences (e.g., ordering colored balls in a different sequence each time), it was expected that the game produced a reminder of the previous correct answer (different sequence) to help children to select a different sequence in the following activity. This remainder was absent. |
